# Supplementary material
Source: Springer Nature journal article supplement (https://www.springermedizin.de/resource/supplementary/12981_2009_118_MOESM3_ESM.pdf/9603862)

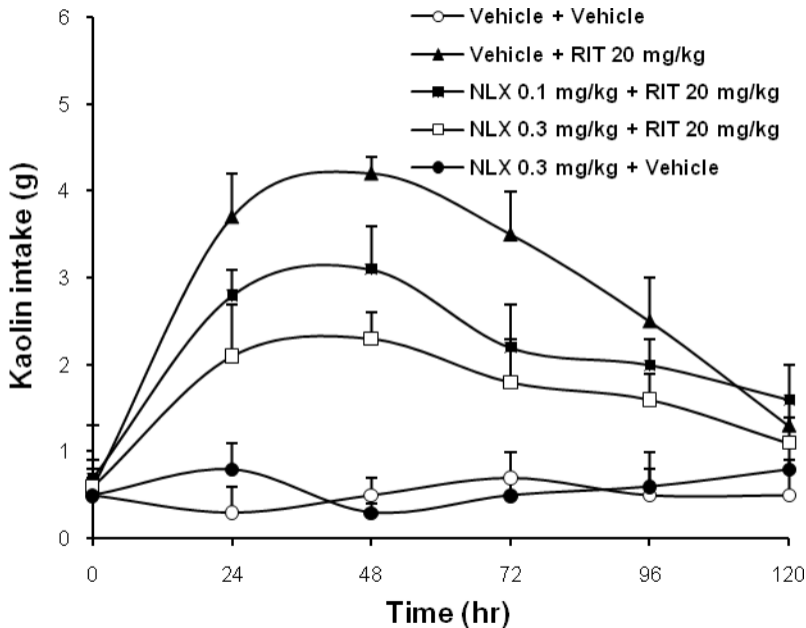

Supplement: MOESM3 [file 9603862]
